# Supplementary material
Source: Springer Nature journal article supplement (https://www.springermedizin.de/resource/supplementary/12985_2010_985_MOESM3_ESM.pdf/9608886)

**A**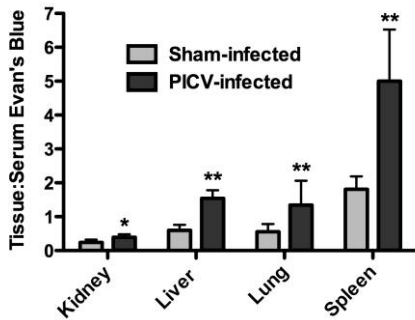**B**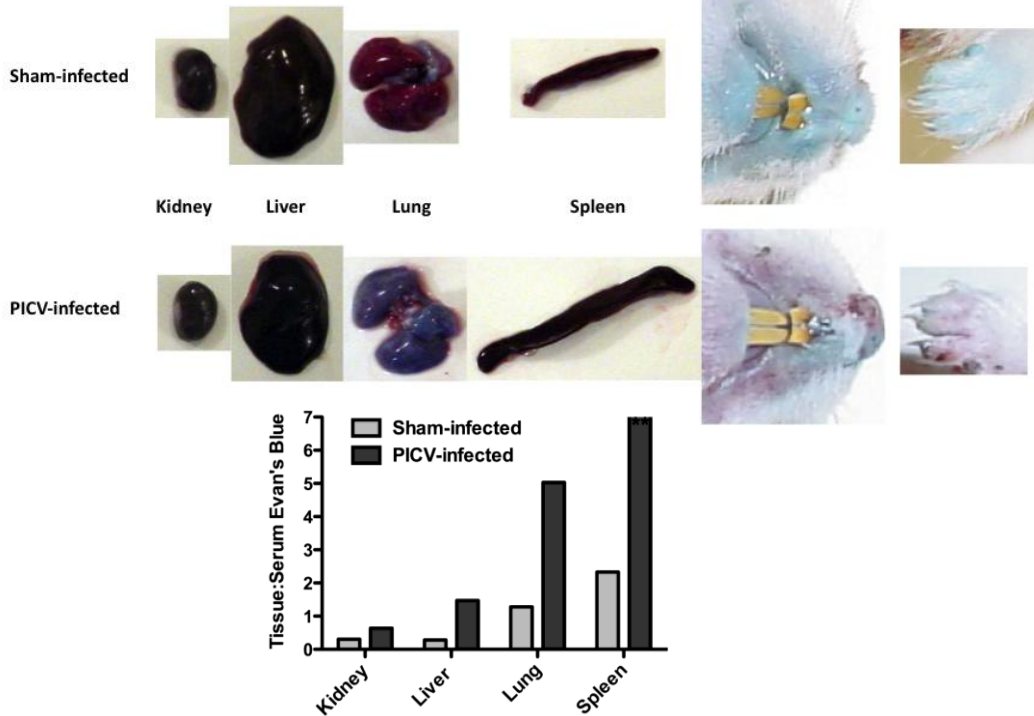

Supplement: MOESM3 [file 9608886]
